# Supplementary material for: Mitochondria dysfunction is one of the causes of diclofenac toxicity in the green alga Chlamydomonas reinhardtii
Source: PeerJ journal article supplement (doi:10.7717/peerj.18005), 2024-08-28

Supplementary Materials to:

## Mitochondria dysfunction is one of the causes of diclofenac toxicity in the green alga *Chlamydomonas reinhardtii*

Darya Harshkova<sup>1</sup>, Elżbieta Zielińska<sup>1</sup>, Magdalena Narajczyk<sup>2</sup>, Małgorzata Kapusta<sup>2</sup> and Anna Aksmann<sup>1\*</sup>

<sup>1</sup> Department of Plant Experimental Biology and Biotechnology, Faculty of Biology, University of Gdansk, Wita Stwosza 59, 80-308 Gdansk, Poland

<sup>2</sup> Bioimaging Laboratory, Faculty of Biology, University of Gdansk, Wita Stwosza 59, 80-308 Gdansk, Poland

Corresponding Author:

Anna Aksmann<sup>1</sup>

Department of Plant Experimental Biology and Biotechnology, Faculty of Biology, University of Gdansk, Wita Stwosza 59, 80-308 Gdansk, Poland

Email address: [anna.aksmann@ug.edu.pl](mailto:anna.aksmann@ug.edu.pl)

### Table S1:

#### Mitochondrial membrane potential of *Chlamydomonas reinhardtii*.

DCF was applied to the culture at the beginning of the cell cycle (0h) at a concentration of 135.5 mg·L<sup>-1</sup>. KCN = potassium cyanide-incubated cells; SHAM = salicylhydroxamic acid-incubated cells; DCF = diclofenac-treated cells. Data shown as mean % of control were originally expressed in arbitrary units (a.u) of MMP. \* = statistically significant differences between control and treated populations,  $p < 0.05$  (Mann–Whitney U test; n=8).

|                             | 0h    | SD   | 3h    | SD   | 6h           | SD   | 9h           | SD   |
|-----------------------------|-------|------|-------|------|--------------|------|--------------|------|
| <b>control</b>              | 100.0 | 11.6 | 100.0 | 31.4 | 100.0        | 50.4 | 100.0        | 32.4 |
| <b>control + KCN</b>        | 90.7  | 20.2 | 79.2  | 18.2 | 75.2         | 60.8 | 96.5         | 17.9 |
| <b>control + SHAM</b>       | 106.3 | 33.6 | 71.9  | 37.3 | 86.0         | 24.5 | <b>55.1*</b> | 24.4 |
| <b>control + KCN + SHAM</b> | 96.6  | 43.8 | 94.5  | 23.8 | 95.0         | 41.3 | <b>63.4*</b> | 7.6  |
| <b>DCF</b>                  | 100.0 | 11.6 | 77.9  | 32.3 | <b>45.1*</b> | 28.0 | <b>33.3*</b> | 17.7 |
| <b>DCF+ KCN</b>             | 90.7  | 20.2 | 64.1  | 22.8 | 47.8         | 30.7 | 40.2         | 18.5 |
| <b>DCF + SHAM</b>           | 106.3 | 33.6 | 79.5  | 18.3 | 53.2         | 30.7 | 46.4         | 18.5 |
| <b>DCF + KCN + SHAM</b>     | 96.6  | 43.8 | 102.2 | 16.0 | 46.6         | 18.8 | 45.6         | 47.5 |

**Table S2:****Correlation matrices (Spearman's test) for values of oxygen consumption rates.**

KCN = potassium cyanide-incubated cells; SHAM = salicylhydroxamic acid-incubated cells; DCF = DCF-treated cells. \* indicates statistically significant correlation between groups at  $p < 0.05$ .

|            | KCN       | SHAM      | KCN + SHAM | DCF       |
|------------|-----------|-----------|------------|-----------|
| KCN        | 1.000000  | -0.085714 | -0.600000  | 0.771429  |
| SHAM       | -0.085714 | 1.000000  | 0.485714   | -0.200000 |
| KCN + SHAM | -0.600000 | 0.485714  | 1.000000   | -0.542857 |
| DCF        | 0.771429  | -0.200000 | -0.542857  | 1.000000  |

**Table S3:****Discriminant analysis of MMP, oxygen consumption rates, and cell volume in *Chlamydomonas reinhardtii* control cells.**

DCF-treated cells and/or with ETC-inhibitors after 6 h from the beginning of the cell cycle. \* indicates statistically significant differences between cultures at  $p < 0.05$  (Mann–Whitney U test;  $n = 8$ ).

|                                                                                                      | Wilks' lambda  | partial lambda  | F-remove (4.23) | p          |
|------------------------------------------------------------------------------------------------------|----------------|-----------------|-----------------|------------|
| MMP, a.u.                                                                                            | <b>0.3073*</b> | <b>0.32582*</b> | <b>11.8997*</b> | $p < 0.05$ |
| oxygen consumption rates,<br>$\text{nmol O}_2 \times 10^6 \text{ cells}^{-1} \times \text{min}^{-1}$ | <b>0.1696*</b> | <b>0.5904*</b>  | <b>3.9892*</b>  | $p < 0.05$ |
| cell volume, fL                                                                                      | 0.1440         | 0.6954          | 2.5190          | 0.0690     |

**Table S4:****Standardization coefficients for canonical variables in the discriminant analysis of MMP, oxygen consumption rates, and cell volume in *Chlamydomonas reinhardtii* control cells.**

Cells treated with diclofenac and/or with ETC inhibitors at 6<sup>th</sup> h of the cell cycle,  $n = 8$ .

|                                                                                                      | Root 1  | Root 2  | Root 3  |
|------------------------------------------------------------------------------------------------------|---------|---------|---------|
| MMP, a.u.                                                                                            | 0.7998  | -0.6402 | -0.0574 |
| oxygen consumption rates,<br>$\text{nmol O}_2 \times 10^6 \text{ cells}^{-1} \times \text{min}^{-1}$ | -0.3580 | -0.7610 | 0.5655  |
| cell volume, fL                                                                                      | 0.5245  | 0.3282  | 0.8017  |

**Table S5:**  
**Correlation matrices (Spearman's test) for values of MMP.**

KCN = potassium cyanide-incubated cells; SHAM = salicylhydroxamic acid-incubated cells; DCF = DCF-treated cells. \* indicates statistically significant correlation between groups at  $p < 0.05$ .

|            | KCN    | SHAM    | KCN + SHAM      | DCF             |
|------------|--------|---------|-----------------|-----------------|
| KCN        | 1.0000 | 0.4196  | 0.1468          | 0.3636          |
| SHAM       | 0.4196 | 1.0000  | 0.0909          | -0.0559         |
| KCN + SHAM | 0.1468 | 0.0909  | 1.0000          | <b>0.65035*</b> |
| DCF        | 0.3636 | -0.0559 | <b>0.65035*</b> | 1.0000          |

**Figure S1:**

**Mean fluorescence intensity measurements in JC-1 staining *Chlamydomonas reinhardtii* cells (confocal microscopy).**

DCF was applied to the culture at 0 h at a concentration of  $135.5 \text{ mg} \times \text{L}^{-1}$ . C-red cells = control material, visible chloroplast and red fluorescent J-aggregates (peak emission  $\sim 570 \text{ nm}$ ); DCF = cells treated with DCF for 24h, some cells show mainly red fluorescence of J-aggregates like control material (DCF- red cells), some show green fluorescence emission at ( $\sim 517 \text{ nm}$ ) for the monomeric form of the cells (DCF-green cells). Data are presented as mean  $\pm$  SD. \* indicates statistically significant differences between control and treated populations ( $p < 0.05$ ; Mann-Whitney U test;  $n = 10$ , each cell was measured in triplicate). Photo credit: Małgorzata Kapusta.

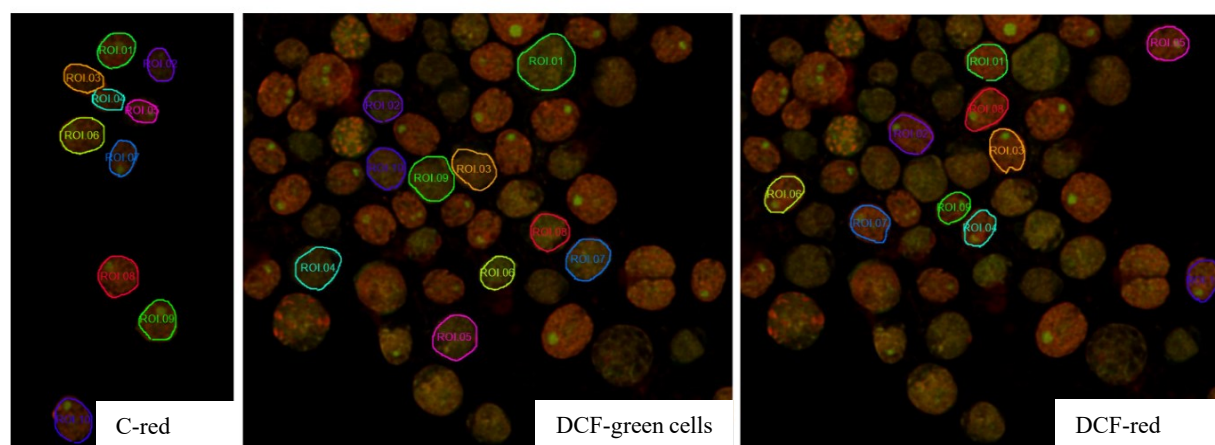

| <b>Monomers (FITC, Ex 495/Em 517 nm)</b>    |                      |                                          |                      |
|---------------------------------------------|----------------------|------------------------------------------|----------------------|
|                                             | C-red cells          | DCF-green cells                          | DCF-red cells        |
| <b>mean <math>\pm</math>SD</b>              | 554.48 $\pm$ 158.54  | 490.78 $\pm$ 133.06                      | 494.94 $\pm$ 116.42  |
| <b>Oligomers (TRITC, Ex 532/ Em 570 nm)</b> |                      |                                          |                      |
|                                             | C-red cells          | DCF-green cells                          | DCF-red cells        |
| <b>mean <math>\pm</math>SD</b>              | 3124.21 $\pm$ 745.92 | <b>2243.17 <math>\pm</math> 626.86 *</b> | 3427.38 $\pm$ 607.91 |

**Figure S2:**

**Visualization of JC-1 fluorescence and autofluorescence of chlorophyll in *Chlamydomonas reinhardtii* cells, control (A) and treated with DCF (B) (confocal microscopy).**

DCF was applied to the culture at 0 h at a concentration of  $135.5 \text{ mg} \times \text{L}^{-1}$ . Multicolor imaging of control (A) and with 24h DCF-treatment (B) of *Chlamydomonas reinhardtii*. Green and red fluorescence represent monomers (max. emission  $\sim 529 \text{ nm}$ ) and oligomers (aggregates) (max. emission  $\sim 590 \text{ nm}$ ) visualized using JC-1, respectively. Merged photos represent JC-1 staining combined with autofluorescence of chlorophyll (blue fluorescence). Photo credit: Małgorzata Kapusta.

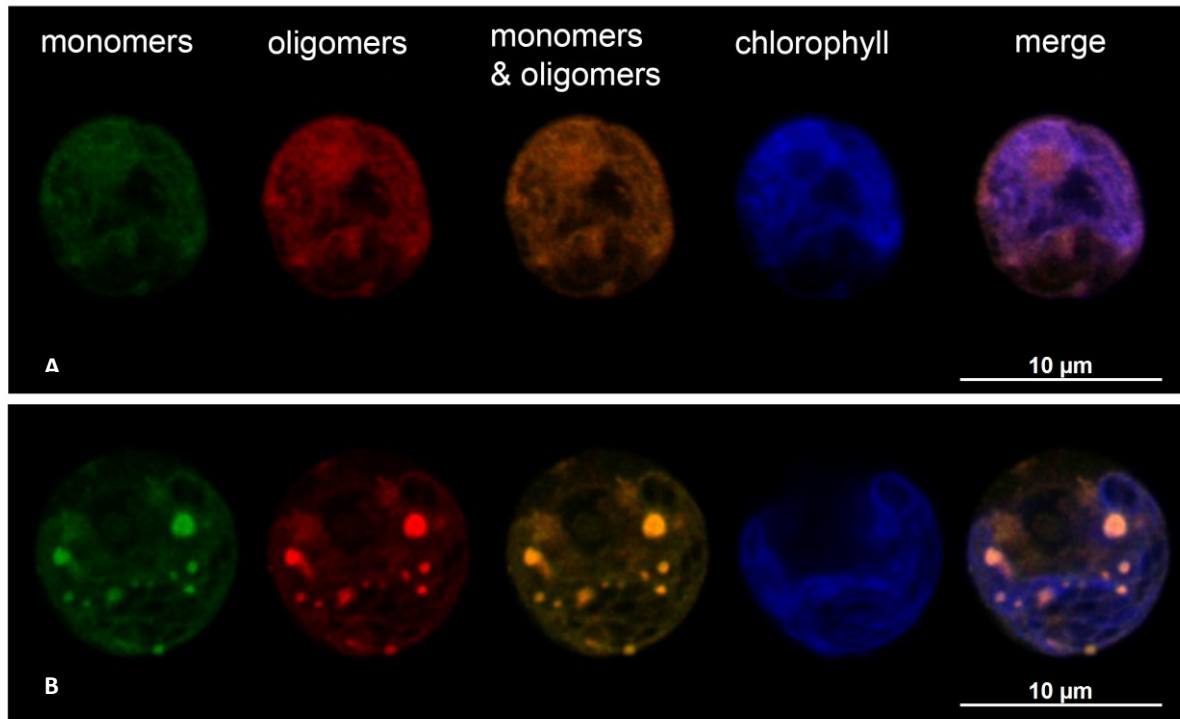

**Figure S3:**

**Visualization of MitoTracker™ Orange CM-H2TMRos fluorescence and autofluorescence of chlorophyll in *Chlamydomonas reinhardtii* cells (confocal microscopy).**

Mitochondria of *Chlamydomonas reinhardtii* stained with MitoTracker™ Orange CM-H2TMRos (yellow fluorescence). Merged photo represent mitochondria staining combined with autofluorescence of chlorophyll (blue fluorescence). Photo credit: Małgorzata Kapusta.

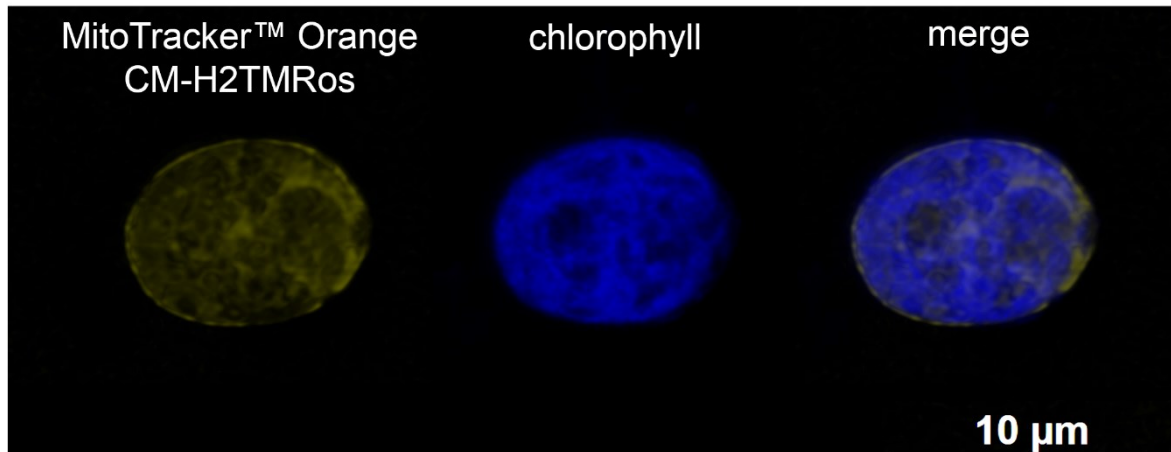

Supplement: Supplementary_materials.pdf [file Supplementary_materials.pdf]
