# Supplementary material for: Mitochondria dysfunction is one of the causes of diclofenac toxicity in the green alga Chlamydomonas reinhardtii
Source: PeerJ. 2024 Aug 28;12:e18005. doi: 10.7717/peerj.18005 (PMC11365475; doi:10.7717/peerj.18005)
Supplement: Supplemental Information 1 — The measurements of population density and cell volume, oxygen consumption rate, mitochondrial membrane potential (MMP), mitochondrial ROS (mtROS) assessment, and measurements of JC-1 fluorescence using confocal microscope. The measurements were the base for figures and tables preparation. [file peerj-12-18005-s001.xlsx]

## Sheet: MMP and mtROS
MMP 0h, JC-1						MMP 3h, JC-1										MMP 6h, JC-1										MMP 9h, JC-1
	control	control + 0.5mM KCN	control + 3mM SHAM	control + 0.5mM KCN + 3mM SHAM			control	control + 0.5mM KCN	control + 3mM SHAM	control + 0.5mM KCN + 3mM SHAM	DCF EC50	DCF + 0.5mM KCN	DCF + 3mM SHAM	DCF + 0.5mM KCN + 3mM SHAM			control	control + 0.5mM KCN	control + 3mM SHAM	control + 0.5mM KCN + 3mM SHAM	DCF EC50	DCF + 0.5mM KCN	DCF + 3mM SHAM	DCF + 0.5mM KCN + 3mM SHAM			control	control + 0.5mM KCN	control + 3mM SHAM	control + 0.5mM KCN + 3mM SHAM	DCF EC50	DCF + 0.5mM KCN	DCF + 3mM SHAM	DCF + 0.5mM KCN + 3mM SHAM
	27.9953	22.0012	40.0153	35.0645			16.571	15.966	23.5175	12.4104	7.87595	13.0138	12.9697	19.6876			21.7067	12.6326	21.4489	19.3956	5.60197	7.88715	10.8159	7.56447			21.3589	16.8177	13.8418	15.1737	6.24303	7.27731	7.93396	8.93562
	24.3602	21.8418	32.4001	32.4056			17.4921	15.6308	23.0143	14.6889	8.52421	8.50834	14.8733	22.7849			21.2923	11.9353	19.4876	23.3336	5.45715	8.95214	10.8881	9.88818			19.1967	21.2748	7.82472	16.3263	6.3598	8.20864	9.19792	7.54814
	23.8035	20.826	34.1386	33.4374			17.4694	16.0262	24.6423	15.1573	8.54979	8.61413	14.7341	24.1864			23.6448	11.0341	23.3665	24.1111	5.60758	9.31965	15.126	9.29631			21.4748	17.873	14.4627	16.0655	6.94702	7.95605	10.2268	7.90384
	20.4463	22.4516	18.7131	12.9866			22.1324	14.0609	18.1516	27.3052	19.4147	11.1137	21.8838	26.8385			13.3652	6.44079	15.6667	23.3561	11.6814	6.77996	6.83103	8.94341			14.0353	17.4208	14.0096	15.3272	8.50275	8.89152	14.6193	6.35016
	19.8131	24.1484	18.171	12.6537			19.1695	13.8269	13.3275	27.6961	20.1956	12.2985	19.1987	27.1633			11.0581	5.66603	13.1929	20.9345	11.3616	7.74579	7.49524	8.44738			12.8933	25.4301	14.7291	13.1799	9.42486	10.8592	14.3593	6.75175
	20.4976	23.0449	17.0901	12.0027			19.2869	13.763	17.5333	27.9909	21.6617	14.6058	22.299	27.0387			12.8635	5.39062	17.4475	30.6986	12.4453	8.72587	8.459	10.0491			15.4231	26.5702	14.3726	13.8435	9.07551	10.1969	13.8972	7.27704
	21.5517	13.67	23.888	16.255			33.7931	22.9939	8.54704	21.1921	23.2375	15.6967	14.5594	17.1772			34.7623	18.133	22.9675	8.84263	10.8385	8.47862	16.8414	12.5086			34.1338	24.1304	10.879	16.9766	6.92509	8.64336	8.99523	18.6829
	18.8203	15.0495	21.4761	16.4386			33.457	22.6253	6.32897	21.8709	22.0923	16.5623	17.7963	20.1897			32.2412	16.5318	26.0529	6.58006	10.4915	12.8497	17.2026	9.21657			32.2302	26.2416	9.02091	16.9562	10.1517	11.1598	11.1228	19.3072
	18.6348	13.8524	21.0615	17.1215			33.7028	21.6433	7.58468	19.5332	22.6904	17.2339	19.2732	25.1326			53.2184	17.4138	8.87819	8.62252	11.0697	13.5461	18.1561	12.8336			24.8081	24.4431	9.87218	16.8601	10.9365	11.7702	12.4634	17.8638
	21.7427		17.4839				18.9876	17.4048	17.3568	22.1904	15.6467	16.4922		17.1485			17.3052	34.9527	21.9799	30.3499	13.2608	14.1191	9.49017	13.0265			34.5855	31.005	17.4159	14.9284	7.2038	8.19198	10.6525
	21.4901		16.4894				15.3041	17.2186	14.9875	17.8367	16.7443	17.298		18.8595			18.1386	35.3858	21.1793	31.5551	13.0166	16.0555	12.9152	12.5697			34.9728	25.8181	17.0839	14.72	8.07852	12.8035	10.5758
	20.7736		15.3502				16.9012	18.0809	14.9291	21.7727	19.3428	17.9478		23.9457			15.082	31.0535	24.4533	33.1621	13.1284	16.8576	11.828	13.5377			29.212	27.1031	18.6818	16.3059	8.16261	12.4383	12.4662
mean	21.6608	19.654	23.0231	20.9295		mean	22.0223	17.4367	15.8267	20.8037	17.1647	14.1154	17.5097	22.5127		mean	22.8899	17.2142	19.6768	21.7452	10.33	10.9431	12.1707	10.6568		mean	24.527	23.6773	13.5162	15.5553	8.16759	9.8664	11.3759	11.18
SD	2.52166	3.97021	7.72859	9.16351		SD	6.9096	3.17935	5.90247	4.9642	5.54185	3.21645	3.19868	3.61228		SD	11.5423	10.4643	4.81622	8.97377	2.89014	3.36771	3.73252	2.00014		SD	7.95828	4.22771	3.30282	1.189	1.4452	1.82539	2.10068	5.31401
SE	0.727941	1.1461	2.23105	2.64528		SE	1.99463	0.917799	1.7039	1.43304	1.59979	0.928509	0.92338	1.04278		SE	3.33199	3.02077	1.39032	2.5905	0.834311	0.972174	1.07749	0.577392		SE	2.29736	1.22043	0.953441	0.343235	0.417192	0.526945	0.606413	1.53402
MtO 0h, MTO			MtO 3h, MTO				MtO 6h, MTO				MtO 9h, MTO
	control			control	DCF EC50			control	DCF EC50			control	DCF EC50
	1.54545			1.38918	1.35053			2.46575	0.934944			1.58411	0.829043
	1.70572			1.2671	1.41966			2.15449	0.935722			1.43499	0.779346
	1.57265			1.31514	1.34849			2.37623	0.944708			1.80305	0.742336
	1.74118			1.43772	0.898794			2.10693	0.944701			2.17684	0.839381
	1.63135			1.3694	0.886454			1.95554	0.90733			0.560065	0.978034
	1.47724			1.48151	0.984748			1.91473	0.980623			1.24076	0.952281
	0.801568			1.94137	0.695193			1.57131	0.887836			0.717687	0.577007
	0.85798			1.83895	0.816348			1.49826	0.904423			0.652006	0.634937
	0.843075			1.50512	0.779398			1.39046	0.8816			0.700941	0.64649
	1.33536			1.75835	0.723758			1.15967	0.738145			0.89777	0.538339
	1.24473			1.27819	0.680825			1.07618	0.689306			0.861868	0.579896
	1.3407			1.62112	0.795184			1.15471	0.787262			0.910646	0.573994
mean	1.34142		mean	1.51693	0.948282		mean	1.73536	0.87805		mean	1.12839	0.72259
SD	0.325706		SD	0.215807	0.259348		SD	0.469374	0.0871164		SD	0.495116	0.14653
SE	0.0940232		SE	0.062298	0.0748672		SE	0.135497	0.0251483		SE	0.142928	0.0422996

## Sheet: The cell volume and number
	0h control	3h control	3h DCF	6h control	6h DCF	9h control	9h DCF
the number of cells per mL	1559600	1559600	1545400	1619600	1524400	1686400	1467400
	1470200	1470200	1643000	1561800	1543600	1826600	1413600
	1588200	1588200	1756200	1695200	1576400	1949800	1612400
	1524400	1524400	1594000	1646600	1446600	1820600	1637400
		1890000	1746600	2038200	1967600	2228400	2078400
		1846000	1837400	1978000	1745400	2172800	1901200
		1734200	1783400	1883400	2075800	2485000	2027000
		1702200	1631000	2012800	2247600	2127600	1944800
mean	1535600	1664350	1692125	1804450	1765925	2037150	1760275
SD	44003.9	143299	96056.9	181763	277213	246376	242172
SE	15557.7	50664	33961.2	64262.9	98009.8	87107.1	85620.9
	0h control	3h control	3h DCF	6h control	6h DCF	9h control	9h DCF
the cell volume, um3	58.53	152.3	117.3	287.8	159.5	511.1	409.1
	66.09	125	101	222.8	137.4	449.8	353.3
	61.99	155	139.4	322	181.5	569.3	449.1
	77.49	128.7	113.5	269.2	150.4	490.2	402.5
	58.95	176.3	161.4	376.4	280.5	653.8	438.3
	71.71	147	138.1	319.7	241.4	565.6	392.9
	82.29	175.6	168.6	357.8	306.3	565.9	455.8
	68.92	139.3	141.9	303.4	281.1	511.2	417.8
mean	68.2463	149.9	135.15	307.387	217.262	539.612	414.85
SD	8.06025	17.9563	21.8914	45.6648	63.2935	58.5391	31.3535
SE	2.84973	6.34852	7.73977	16.1449	22.3776	20.6967	11.0852

## Sheet: 6h_OxyLab
6h	nmolO2/1mL/1min			the cell volume			the number of cells			nmol O2/1 cell/1 min			pmol O2/1 cell/1 min			nmol O2/1 mln cells/1 min			nmol O2/100 um3/1 min			nmol O2/100 um3/1h			pmol O2/100 um3/1h
	A	B	C	A	B	C	A	B	C	A	B	C	A	B	C	A	B	C	A	B	C	A	B	C	A	B	C
control 1	20.56	39.29	25	384.2	363.9	378.4	1506800	1203022	1434000	1.36448e-05	3.26594e-05	1.74338e-05	0.0136448	0.0326594	0.0174338	13.6448	32.6594	17.4338	3.55149e-06	8.97483e-06	4.60723e-06	0.000213089	0.00053849	0.000276434	0.213089	0.53849	0.276434
control 2	27.41	23.31	48.5	295.9	300.4	341.2	1468800	1420000	1484600	1.86615e-05	1.64155e-05	3.26687e-05	0.0186615	0.0164155	0.0326687	18.6615	16.4155	32.6687	6.30669e-06	5.46454e-06	9.57466e-06	0.000378401	0.000327873	0.000574479	0.378401	0.327873	0.574479
control 1 + 0.5mM KCN	11.94	14.3	33.39	384.2	363.9	378.4	1506800	1203022	1434000	7.92408e-06	1.18867e-05	2.32845e-05	0.00792408	0.0118867	0.0232845	7.92408	11.8867	23.2845	2.06249e-06	3.26648e-06	6.15341e-06	0.000123749	0.000195989	0.000369205	0.123749	0.195989	0.369205
control 2 + 0.5mM KCN	3.746	23.92	37.61	295.9	300.4	341.2	1468800	1420000	1484600	2.55038e-06	1.68451e-05	2.53334e-05	0.00255038	0.0168451	0.0253334	2.55038	16.8451	25.3334	8.61906e-07	5.60755e-06	7.4248e-06	5.17144e-05	0.000336453	0.000445488	0.0517144	0.336453	0.445488
control 1 + 3mM SHAM	18.41	25.9	24.93	384.2	363.9	378.4	1506800	1203022	1434000	1.22179e-05	2.15291e-05	1.73849e-05	0.0122179	0.0215291	0.0173849	12.2179	21.5291	17.3849	3.1801e-06	5.91622e-06	4.59433e-06	0.000190806	0.000354973	0.00027566	0.190806	0.354973	0.27566
control 2 + 3mM SHAM	20.99	22.53	11.07	295.9	300.4	341.2	1468800	1420000	1484600	1.42906e-05	1.58662e-05	7.45655e-06	0.0142906	0.0158662	0.00745655	14.2906	15.8662	7.45655	4.82953e-06	5.28169e-06	2.18539e-06	0.000289772	0.000316901	0.000131123	0.289772	0.316901	0.131123
control 1 + 0.5mM KCN + 3mM SHAM	24	22.78	19.69	384.2	363.9	378.4	1506800	1203022	1434000	1.59278e-05	1.89356e-05	1.37308e-05	0.0159278	0.0189356	0.0137308	15.9278	18.9356	13.7308	4.1457e-06	5.20353e-06	3.62865e-06	0.000248742	0.000312212	0.000217719	0.248742	0.312212	0.217719
control 2 + 0.5mM KCN + 3mM SHAM	20.53	21.12	16.82	295.9	300.4	341.2	1468800	1420000	1484600	1.39774e-05	1.48732e-05	1.13297e-05	0.0139774	0.0148732	0.0113297	13.9774	14.8732	11.3297	4.72369e-06	4.95114e-06	3.32053e-06	0.000283421	0.000297069	0.000199232	0.283421	0.297069	0.199232
DCF1	46.18	39.58	52.92	268.9	300.6	314.8	1275800	1331400	1295800	3.61969e-05	2.97281e-05	4.08396e-05	0.0361969	0.0297281	0.0408396	36.1969	29.7281	40.8396	1.34611e-05	9.88959e-06	1.29732e-05	0.000807666	0.000593375	0.000778392	0.807666	0.593375	0.778392
DCF2	28.21	36.54	48.1	240.4	285.8	304.8	1378200	1155000	1248400	2.04687e-05	3.16364e-05	3.85293e-05	0.0204687	0.0316364	0.0385293	20.4687	31.6364	38.5293	8.51445e-06	1.10694e-05	1.26409e-05	0.000510867	0.000664164	0.000758451	0.510867	0.664164	0.758451
DCF1 + 0.5mM KCN	19.26	30.71	34.44	268.9	300.6	314.8	1506800	1203022	1434000	1.27821e-05	2.55274e-05	2.40167e-05	0.0127821	0.0255274	0.0240167	12.7821	25.5274	24.0167	4.75346e-06	8.49214e-06	7.6292e-06	0.000285208	0.000509529	0.000457752	0.285208	0.509529	0.457752
DCF2 + 0.5mM KCN	2.778	33.7	24.59	240.4	285.8	304.8	1468800	1420000	1484600	1.89134e-06	2.37324e-05	1.65634e-05	0.00189134	0.0237324	0.0165634	1.89134	23.7324	16.5634	7.86747e-07	8.30385e-06	5.43418e-06	4.72048e-05	0.000498231	0.000326051	0.0472048	0.498231	0.326051
DCF1 + 3mM SHAM	32.86	32.01	30.07	268.9	300.6	314.8	1506800	1203022	1434000	2.18078e-05	2.6608e-05	2.09693e-05	0.0218078	0.026608	0.0209693	21.8078	26.608	20.9693	8.11001e-06	8.85163e-06	6.66116e-06	0.0004866	0.000531098	0.000399669	0.4866	0.531098	0.399669
DCF2 + 3mM SHAM	29.62	28.51	13.88	240.4	285.8	304.8	1468800	1420000	1484600	2.01661e-05	2.00775e-05	9.34932e-06	0.0201661	0.0200775	0.00934932	20.1661	20.0775	9.34932	8.38857e-06	7.02501e-06	3.06736e-06	0.000503314	0.0004215	0.000184042	0.503314	0.4215	0.184042
DCF1 + 0.5mM KCN + 3mM SHAM	18.17	18.19	17.92	268.9	300.6	314.8	1506800	1203022	1434000	1.20587e-05	1.51203e-05	1.24965e-05	0.0120587	0.0151203	0.0124965	12.0587	15.1203	12.4965	4.48444e-06	5.03003e-06	3.96967e-06	0.000269067	0.000301802	0.00023818	0.269067	0.301802	0.23818
DCF2 + 0.5mM KCN + 3mM SHAM	15.09	17.8	25.83	240.4	285.8	304.8	1468800	1420000	1484600	1.02737e-05	1.25352e-05	1.73986e-05	0.0102737	0.0125352	0.0173986	10.2737	12.5352	17.3986	4.27358e-06	4.38601e-06	5.70821e-06	0.000256415	0.00026316	0.000342493	0.256415	0.26316	0.342493
	nmol O2/1 mln cells/1 min	SD	SE	pmol O2/100 um3/ 1h	SD	SE
control	21.9139	7.75019	3.164	0.384794	0.131725	0.0537764
control + KCN	14.6374	8.09096	3.30312	0.253766	0.140231	0.057249
control + SHAM	14.7909	4.35798	1.77914	0.259873	0.0761425	0.0310851
control + KCN + SHAM	14.7958	2.31818	0.946395	0.259733	0.041343	0.0168782
DCF	32.8998	6.73041	2.74768	0.685486	0.106704	0.0435617
DCF + KCN	17.4189	8.29133	3.38492	0.353996	0.160931	0.0656999
DCF + SHAM	19.8297	5.18282	2.11588	0.421037	0.115329	0.047083
DCF + KCN + SHAM	13.3138	2.31087	0.943411	0.278519	0.0343408	0.0140196

## Sheet: fluorescence intensity
control
	ROI.01	ROI.02	ROI.03	ROI.04	ROI.05	ROI.06	ROI.07	ROI.08	ROI.09	ROI.10	mean	SD	mean	SD
Channel.001	591.38	429.82	274.12	413.76	490.83	434.44	431.57	278.78	627.65	343.81	431.616	111.204
Channel.001	665.79	478.21	557.76	576.32	687.85	824.97	669.54	801.89	936.48	715.59	691.44	129.768
Channel.001	601.23	513	446.19	518.97	561.02	683.11	304.06	662.76	644.94	468.49	540.377	110.229	554.478	158.545
Channel.002	3270.23	1954.83	2040.95	2619.82	2574.38	2426.34	2785.71	2483.61	3417.04	2487.42	2606.03	440.125
Channel.002	3990.15	2116.35	3216.7	3437.79	3385.11	3870.63	3379.75	4497.69	4452.77	4154.54	3650.15	671.567
Channel.002	3633.28	2434.44	2734.84	3188.66	2572.66	3719.64	1880.97	4341.08	3587.85	3071.03	3116.44	692.318	3124.21	745.921
DCF EC50
	ROI.01	ROI.02	ROI.03	ROI.04	ROI.05	ROI.06	ROI.07	ROI.08	ROI.09	ROI.10	mean	SD	mean	SD
Channel.001 DCF-green	516.72	405.34	363.75	376.71	338.69	443.19	483.97	606.44	408.99	457.38	440.118	76.2103
Channel.001 DCF-green	754.81	568.07	585.64	542.86	602.28	568.85	654.93	776.27	721.14	534.45	630.93	85.3966
Channel.001 DCF-green	562.57	506.49	485.98	237.08	413.79	427.01	416.77	379.78	317.14	266.44	401.305	98.9957	490.784	133.06
Channel.001 DCF-red	295.7	436.25	416.43	422.03	292	391.57	416	360.7	402.32	398.29	383.129	48.6265
Channel.001 DCF-red	573.29	474.96	570.61	576.65	642.17	529.95	489.88	386.47	449.55	602.1	529.563	74.29
Channel.001 DCF-red	790.21	683.96	689.62	491.12	398.39	466	501.34	592.51	513.86	594.23	572.124	114.539	494.939	116.419
Channel.002 DCF-green	1965.3	1323.67	1770.06	1594.27	1587.55	1923.48	2436.86	2427.09	1915.77	2343.07	1928.71	360.459
Channel.002 DCF-green	2669.46	2001.82	2924.7	2177.94	2354.11	2329.88	3051.21	3020.52	2918.08	2782.51	2623.02	359.061
Channel.002 DCF-green	2778.01	2795.38	3188.77	2059.57	1390.77	1937.91	2091.56	2372.5	255.97	2907.29	2177.77	820.097	2243.17	626.861
Channel.002 DCF-red	2273.49	3740	3457.52	3327.74	2429.65	3035.8	3282.49	2947.41	3468.45	3096.01	3105.86	437.94
Channel.002 DCF-red	4268.29	3614.33	4086.57	3872.55	4074.38	4092.46	4027.25	3106.81	3197.26	4293.16	3863.31	400.069
Channel.002 DCF-red	4136.74	4073.29	4040.59	2208.91	3476.25	3511.91	3560.15	2841.86	2988.96	2291.25	3312.99	671.062	3427.38	607.91

## Sheet: stat analysis_OxyLab
Variable	Mann-Whitney U Test (with continuity correction) (Stat_Results) Relative to the variable: groups Marked results are significant at p < .05000
	Sum.rang	Sum.rang	U	Z	p	Z	p	N ważn.	N ważn.	2*1str.
oxygen consumption, 6h, nmol O2/1 mln cells/1min	47	31	10	1.20096	0.229767	1.20096	0.229767	6	6	0.24026
Variable	Mann-Whitney U Test (with continuity correction) (Stat_Results) Relative to the variable: groups Marked results are significant at p < .05000
	Sum.rang	Sum.rang	U	Z	p	Z	p	N ważn.	N ważn.	2*1str.
oxygen consumption, 6h, nmol O2/1 mln cells/1min	49	29	8	1.52122	0.128206	1.52122	0.128206	6	6	0.132035
Variable	Mann-Whitney U Test (with continuity correction) (Stat_Results) Relative to the variable: groups Marked results are significant at p < .05000
	Sum.rang	Sum.rang	U	Z	p	Z	p	N ważn.	N ważn.	2*1str.
oxygen consumption, 6h, nmol O2/1 mln cells/1min	49	29	8	1.52122	0.128206	1.52122	0.128206	6	6	0.132035
Variable	Mann-Whitney U Test (with continuity correction) (Stat_Results) Relative to the variable: groups Marked results are significant at p < .05000
	Sum.rang	Sum.rang	U	Z	p	Z	p	N ważn.	N ważn.	2*1str.
oxygen consumption, 6h, nmol O2/1 mln cells/1min	27	51	6	-1.84147	0.0655531	-1.84147	0.0655531	6	6	0.0649351
Variable	Mann-Whitney U Test (with continuity correction) (Stat_Results) Relative to the variable: groups Marked results are significant at p < .05000
	Sum.rang	Sum.rang	U	Z	p	Z	p	N ważn.	N ważn.	2*1str.
oxygen consumption, 6h, nmol O2/1 mln cells/1min	54	24	3	2.32186	0.0202412	2.32186	0.0202412	6	6	0.0151515
Variable	Mann-Whitney U Test (with continuity correction) (Stat_Results) Relative to the variable: groups Marked results are significant at p < .05000
	Sum.rang	Sum.rang	U	Z	p	Z	p	N ważn.	N ważn.	2*1str.
oxygen consumption, 6h, nmol O2/1 mln cells/1min	54	24	3	2.32186	0.0202412	2.32186	0.0202412	6	6	0.0151515
Variable	Mann-Whitney U Test (with continuity correction) (Stat_Results) Relative to the variable: groups Marked results are significant at p < .05000
	Sum.rang	Sum.rang	U	Z	p	Z	p	N ważn.	N ważn.	2*1str.
oxygen consumption, 6h, nmol O2/1 mln cells/1min	57	21	0	2.80224	0.00507517	2.80224	0.00507517	6	6	0.0021645
Variable	Mann-Whitney U Test (with continuity correction) (Stat_Results) Relative to the variable: groups Marked results are significant at p < .05000
	Sum.rang	Sum.rang	U	Z	p	Z	p	N ważn.	N ważn.	2*1str.
oxygen consumption, 6h, nmol O2/1 mln cells/1min	35	43	14	-0.560449	0.575174	-0.560449	0.575174	6	6	0.588745
Variable	Mann-Whitney U Test (with continuity correction) (Stat_Results) Relative to the variable: groups Marked results are significant at p < .05000
	Sum.rang	Sum.rang	U	Z	p	Z	p	N ważn.	N ważn.	2*1str.
oxygen consumption, 6h, nmol O2/1 mln cells/1min	29	49	8	-1.52122	0.128206	-1.52122	0.128206	6	6	0.132035
Variable	Mann-Whitney U Test (with continuity correction) (Stat_Results) Relative to the variable: groups Marked results are significant at p < .05000
	Sum.rang	Sum.rang	U	Z	p	Z	p	N ważn.	N ważn.	2*1str.
oxygen consumption, 6h, nmol O2/1 mln cells/1min	45	33	12	0.880705	0.378478	0.880705	0.378478	6	6	0.393939
